# Supplementary material for: Regulating luminescence thermal enhancement in negative thermal expansion metal–organic frameworks
Source: Royal Society of Chemistry journal article supplement (doi:10.1039/d3sc06710f), 2024-01-01
Supplement: d3sc06710f1.pdf [file d3sc06710f1.pdf]

## Supporting Information

### **Regulating luminescent thermal enhancement in negative thermal expansion metal-organic frameworks**

Liang Chen,<sup>a</sup> Yili Cao,<sup>\*a</sup> Rui Ma,<sup>a</sup> Hongmei Cao,<sup>a</sup> Xin Chen,<sup>a</sup> Kun Lin,<sup>a</sup> Qiang Li,<sup>a</sup>  
Jinxia Deng,<sup>a</sup> Chunyu Liu,<sup>b</sup> Yilin Wang,<sup>c</sup> Ling Huang<sup>\*c</sup> and Xianran Xing<sup>\*a</sup>

<sup>a</sup>Beijing Advanced Innovation Center for Materials Genome Engineering, Institute of Solid State Chemistry, University of Science and Technology Beijing, Beijing, 100083, China.

<sup>b</sup>Department of Chemistry, Key Laboratory of Organic Optoelectronics and Molecular Engineering of the Ministry of Education, Tsinghua University, Beijing 100084, P.R. China.

<sup>c</sup>Institute of Advanced Materials, Nanjing Tech University, Nanjing, 211816, China.

\*Correspondence: [yilicao@ustb.edu.cn](mailto:yilicao@ustb.edu.cn); [iamlhuang@njtech.edu.cn](mailto:iamlhuang@njtech.edu.cn); [xing@ustb.edu.cn](mailto:xing@ustb.edu.cn);

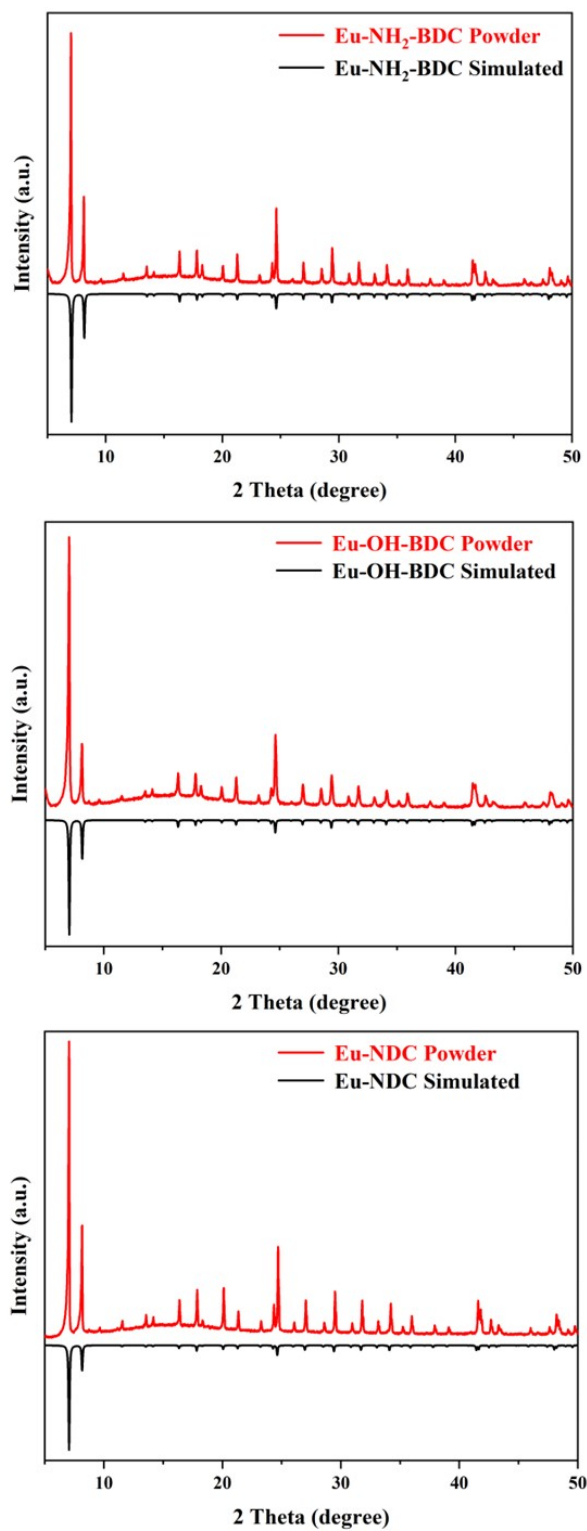

**Figure S1.** Powder X-Ray diffraction patterns of the activated powder of Eu-NH<sub>2</sub>-BDC, Eu-OH-BDC, and Eu-NDC. The experimental patterns are compared to the simulated pattern based on the refined activated single crystal structures. Powder patterns were simulated from SCXRD structures using Mercury.<sup>1</sup>

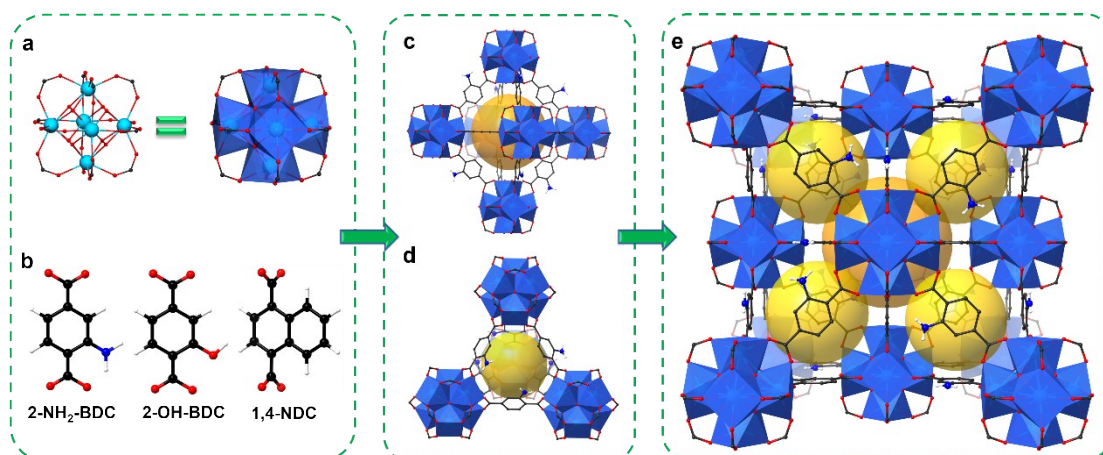

**Figure S2.** Schematic illustration of the structure of Eu-based isomeric MOFs with Eu-NH<sub>2</sub>-BDC as an example. All hydrogens are omitted except for the hydrogen on the amino group for clarity. (Color code: Eu, sky blue; O, red; N, blue; C, black; H, white). (a) The 12-connected molecular building block. (b) The ligands with different functional groups. (c) The tetrahedral cage (green sphere) constructed from 6 molecular building blocks and 12 ligands. (d) The octahedral cage (yellow sphere) constructed from 4 molecular building blocks and 6 ligands. (e) The 3D network structure of Eu-NH<sub>2</sub>-BDC.

## Optical Measurement

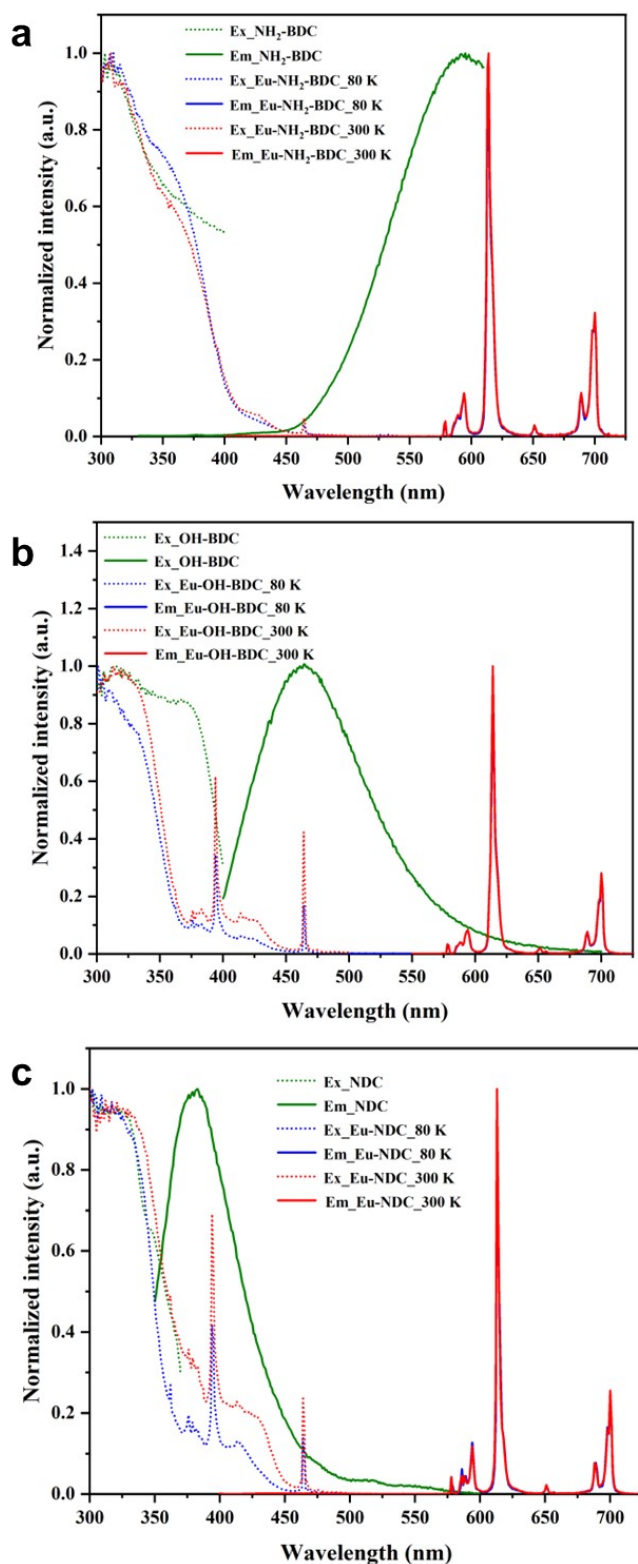

**Figure S3.** Photoluminescence excitation (dotted lines) and emission (solid lines) spectrum of (a) Eu-NH<sub>2</sub>-BDC, (b) Eu-OH-BDC, and (c) Eu-NDC. The excitation and emission of the corresponding ligand for each structure are also included.

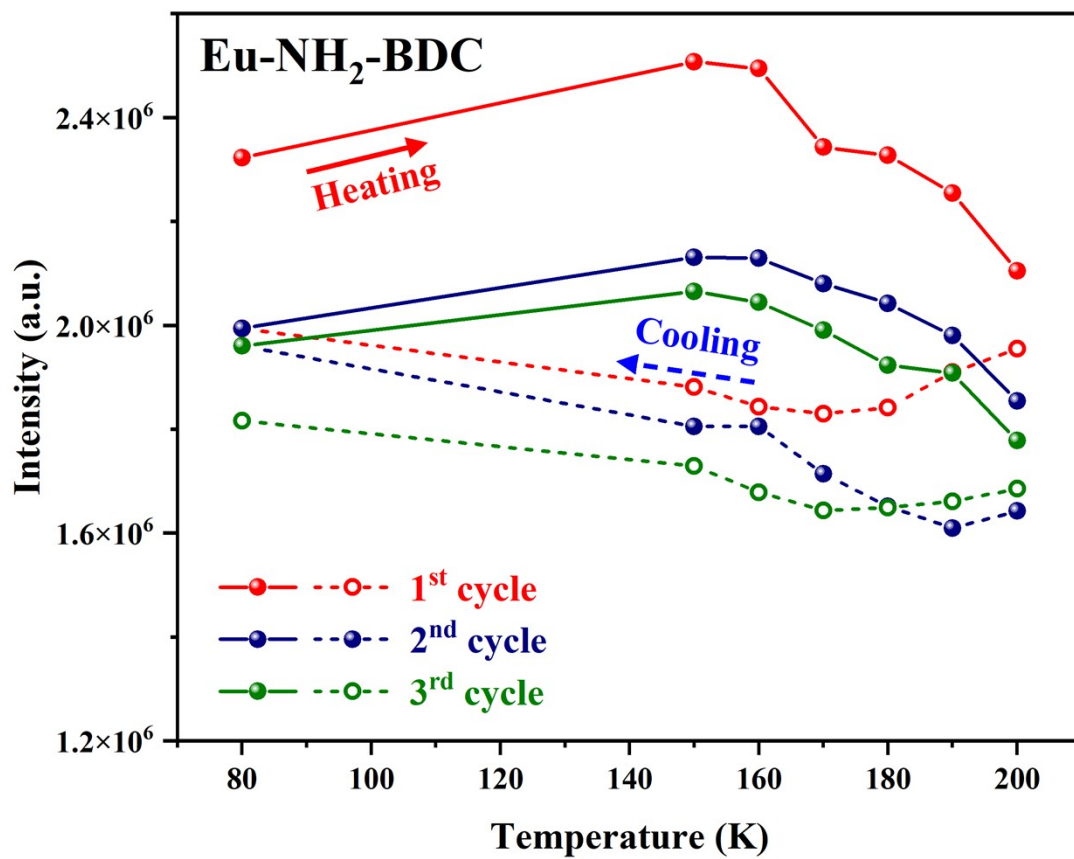

**Figure S4.** Reversibility of temperature-dependence of the maximum emission intensity of Eu-NH<sub>2</sub>-BDC.

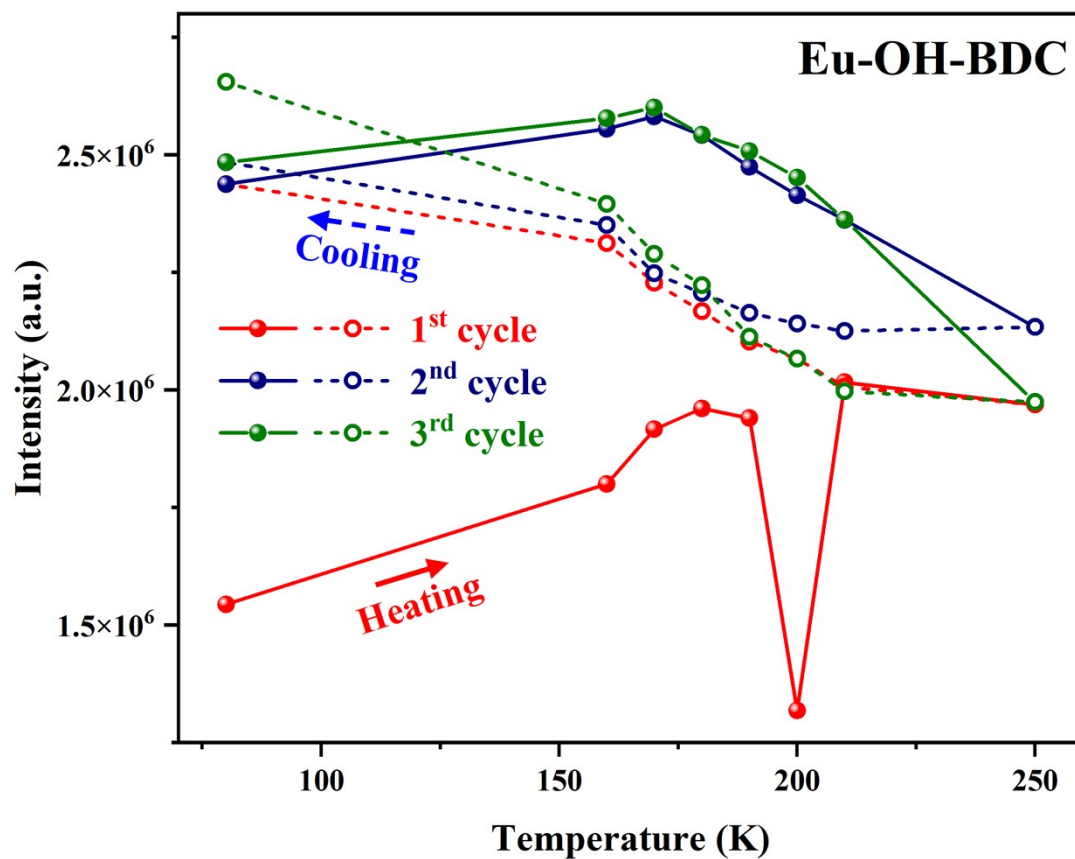

**Figure S5.** Reversibility of temperature-dependence of the maximum emission intensity of Eu-OH-BDC.

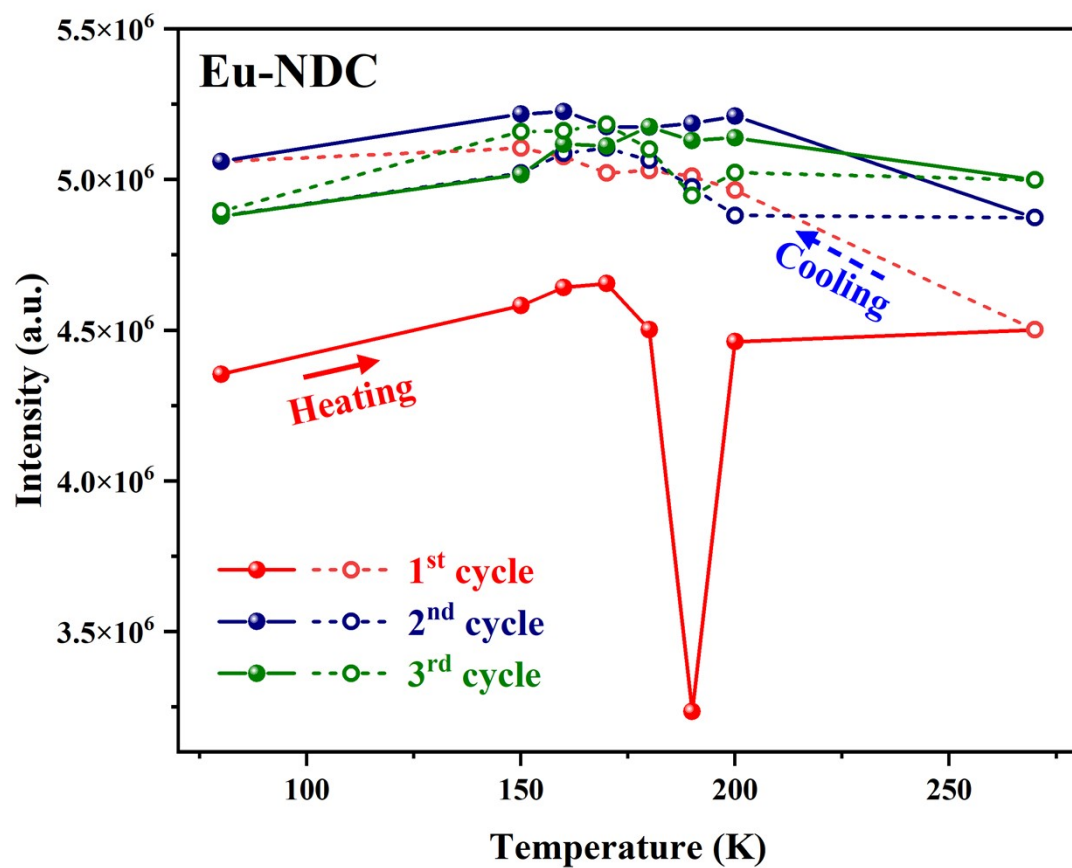

**Figure S6.** Reversibility of temperature-dependence of the maximum emission intensity of Eu-NDC.

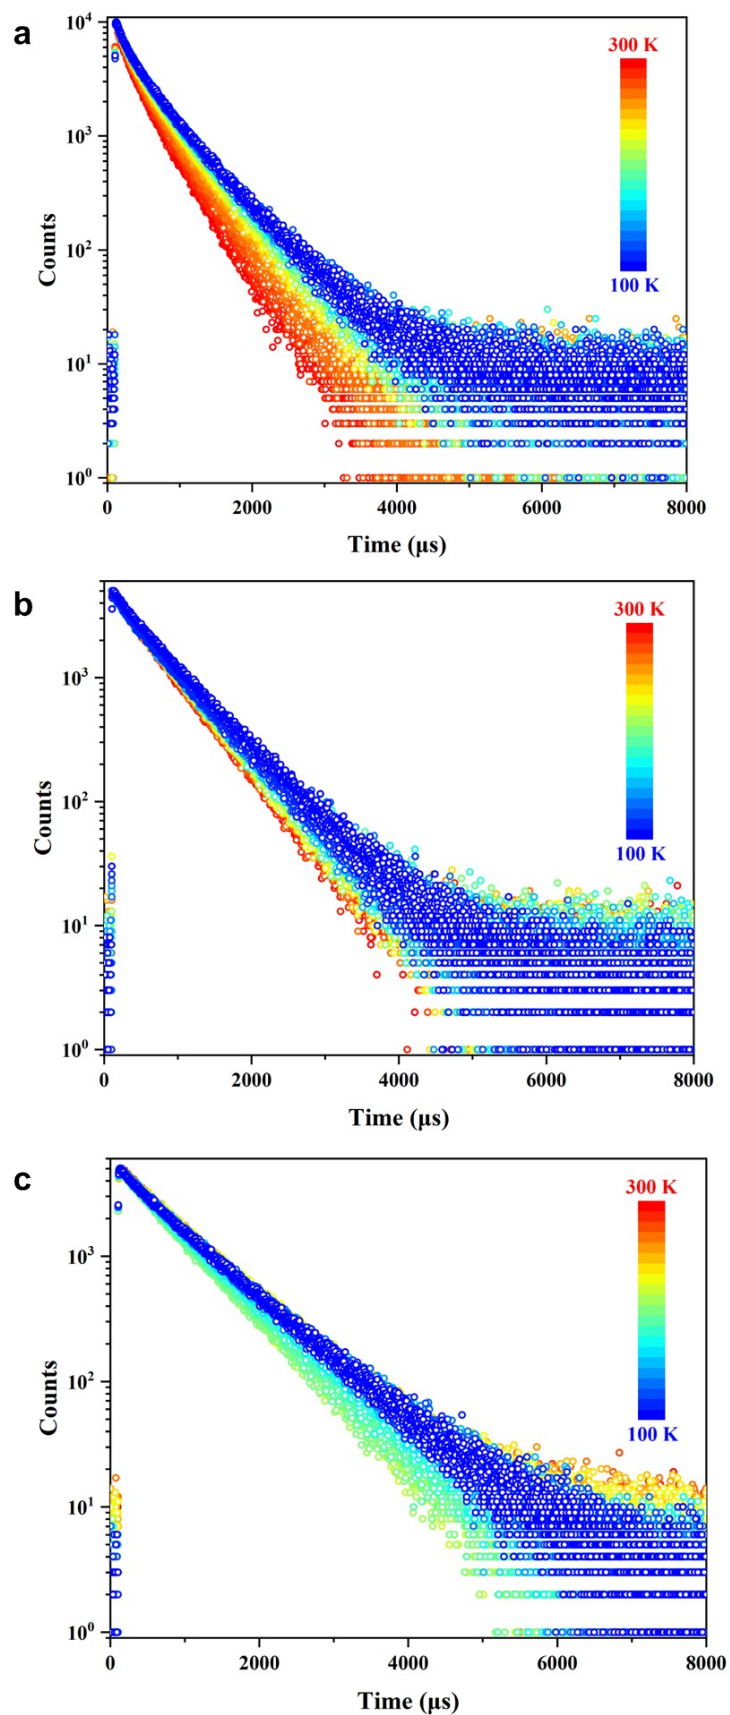

**Figure S7.** Decay curves as a function of temperature in (a) Eu-NH<sub>2</sub>-BDC, (b) Eu-OH-BDC, and (c) Eu-NDC, respectively.



**Table S1** Summary of photophysical properties for Eu-NH<sub>2</sub>-BDC, Eu-OH-BDC and Eu-NDC at 300 K.

|                         | $\lambda_{\text{ex}}$ [nm] | $\Phi$ [%] | $\tau_{\text{av}}$ [ $\mu\text{s}$ ] |
|-------------------------|----------------------------|------------|--------------------------------------|
| Eu-NH <sub>2</sub> -BDC | 360                        | 0.35       | 334.3                                |
| Eu-OH-BDC               | 394                        | 1.92       | 561.0                                |
| Eu-NDC                  | 394                        | 5.67       | 740.4                                |

$\lambda_{\text{ex}}$  represent the wavelength of excitation,  $\Phi$  is the PLQY,  $\tau_{\text{av}}$  is the PL lifetime.

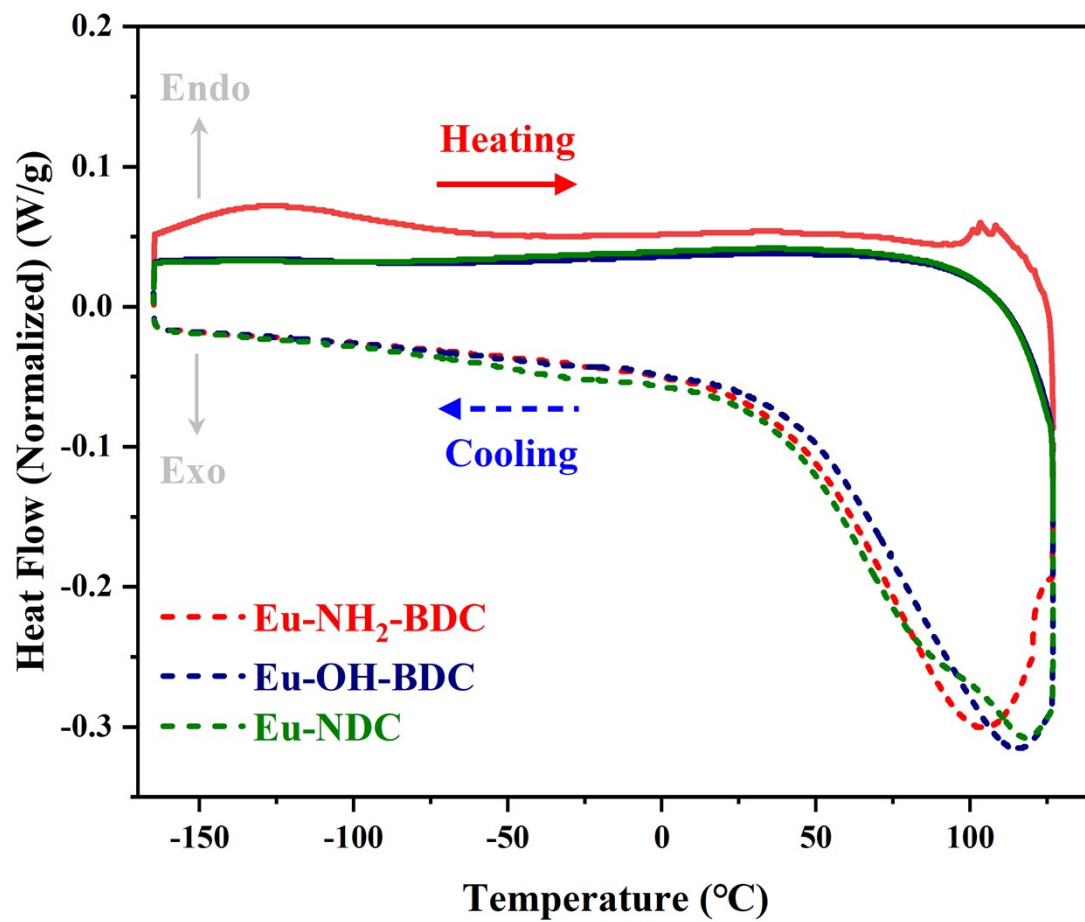

**Figure S8.** The DSC curves for Eu-NH<sub>2</sub>-BDC, Eu-OH-BDC, and Eu-NDC under N<sub>2</sub> atmosphere (5 °C·min<sup>-1</sup>).

**First round of variable-temperature Powder X-ray diffraction (PXRD) data and Rietveld refinement**

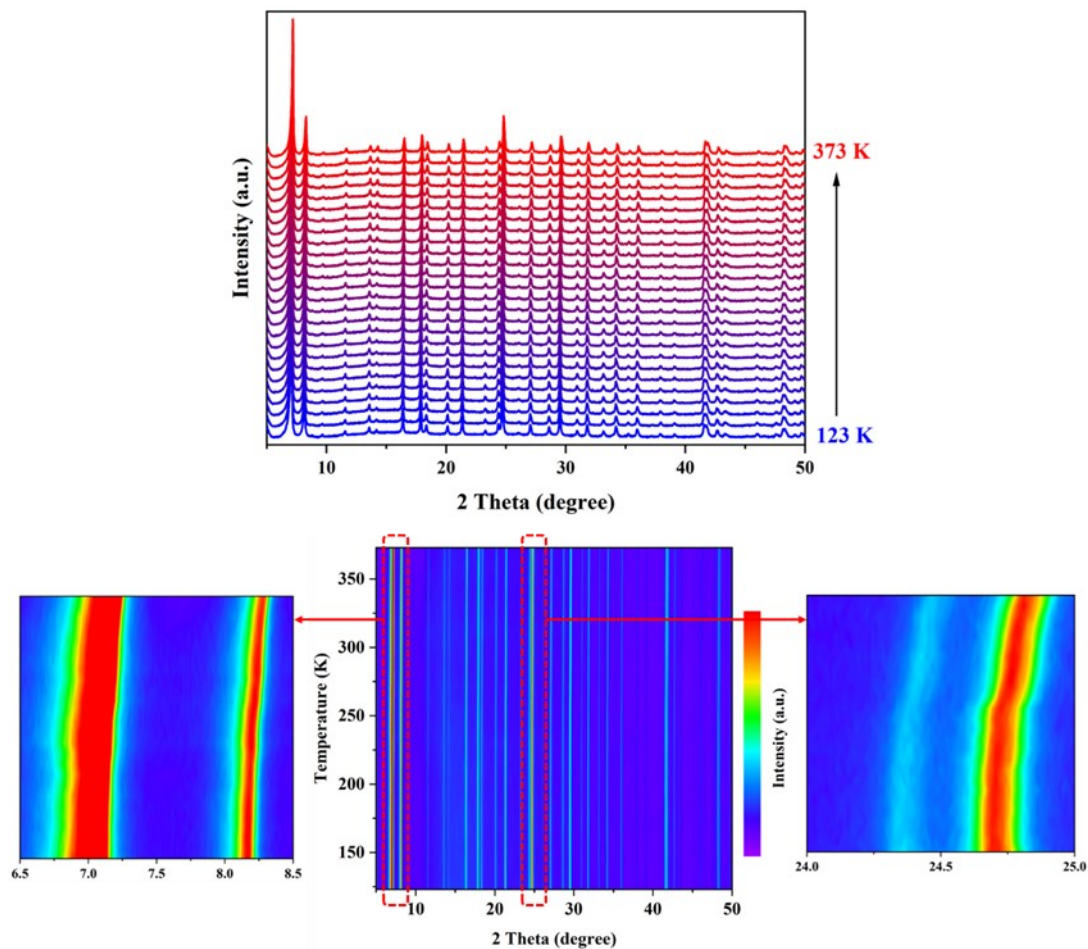

**Figure S9.** First round of variable-temperature PXRD patterns of Eu-NH<sub>2</sub>-BDC (top) and 2D contours of Eu-NH<sub>2</sub>-BDC (bottom).

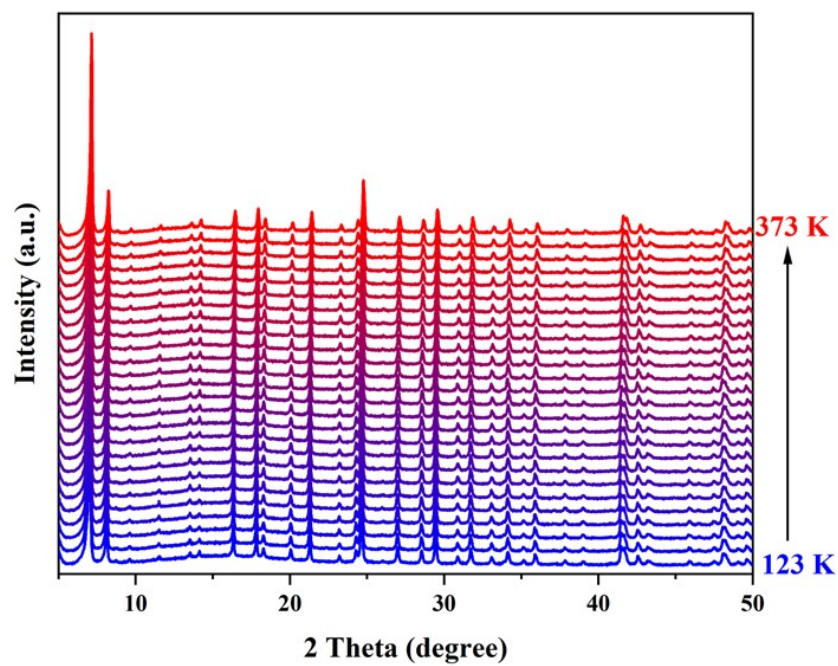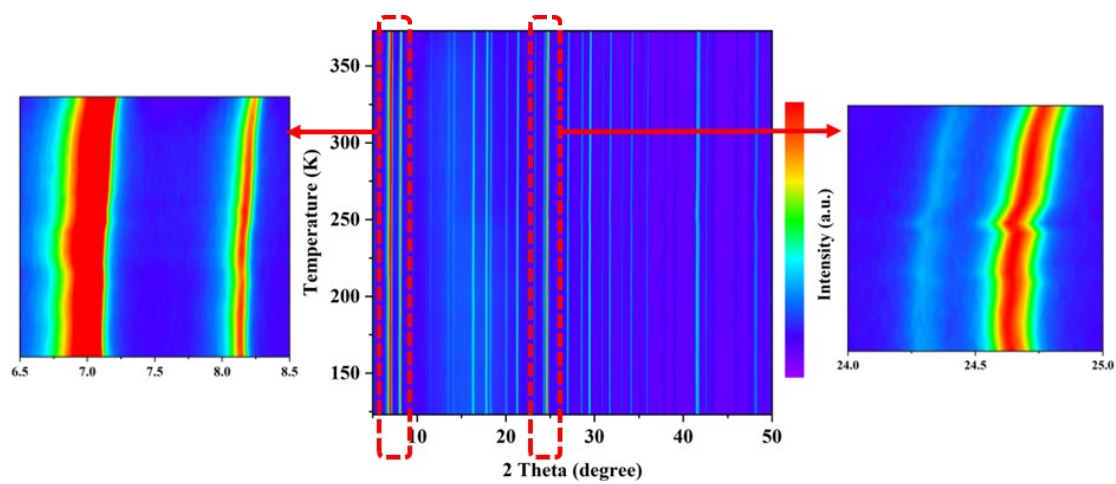

**Figure S10.** First round of variable-temperature PXRD patterns of Eu-OH-BDC (top) and 2D contours of Eu-OH-BDC (bottom).

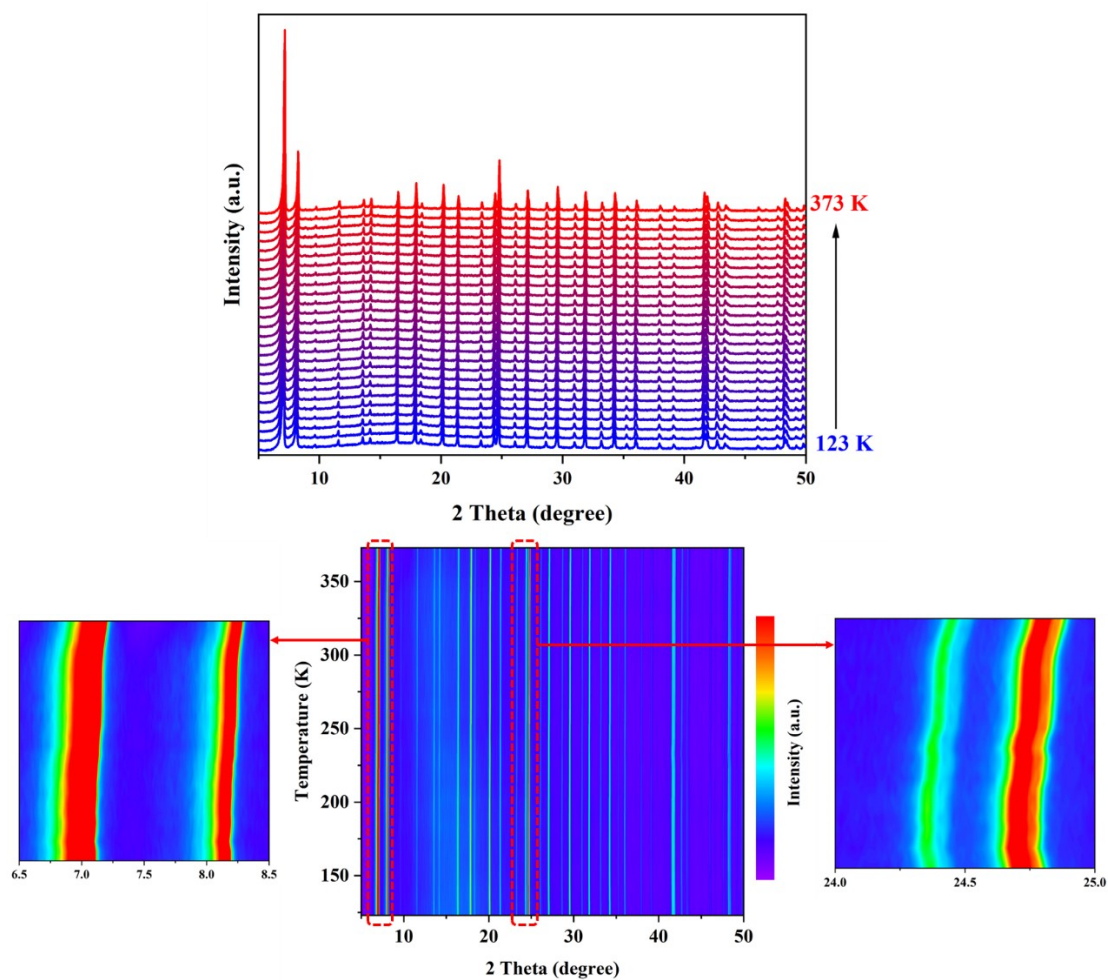

**Figure S11.** First round of variable-temperature PXRD patterns of Eu-NDC (top) and 2D contours of Eu-NDC (bottom).

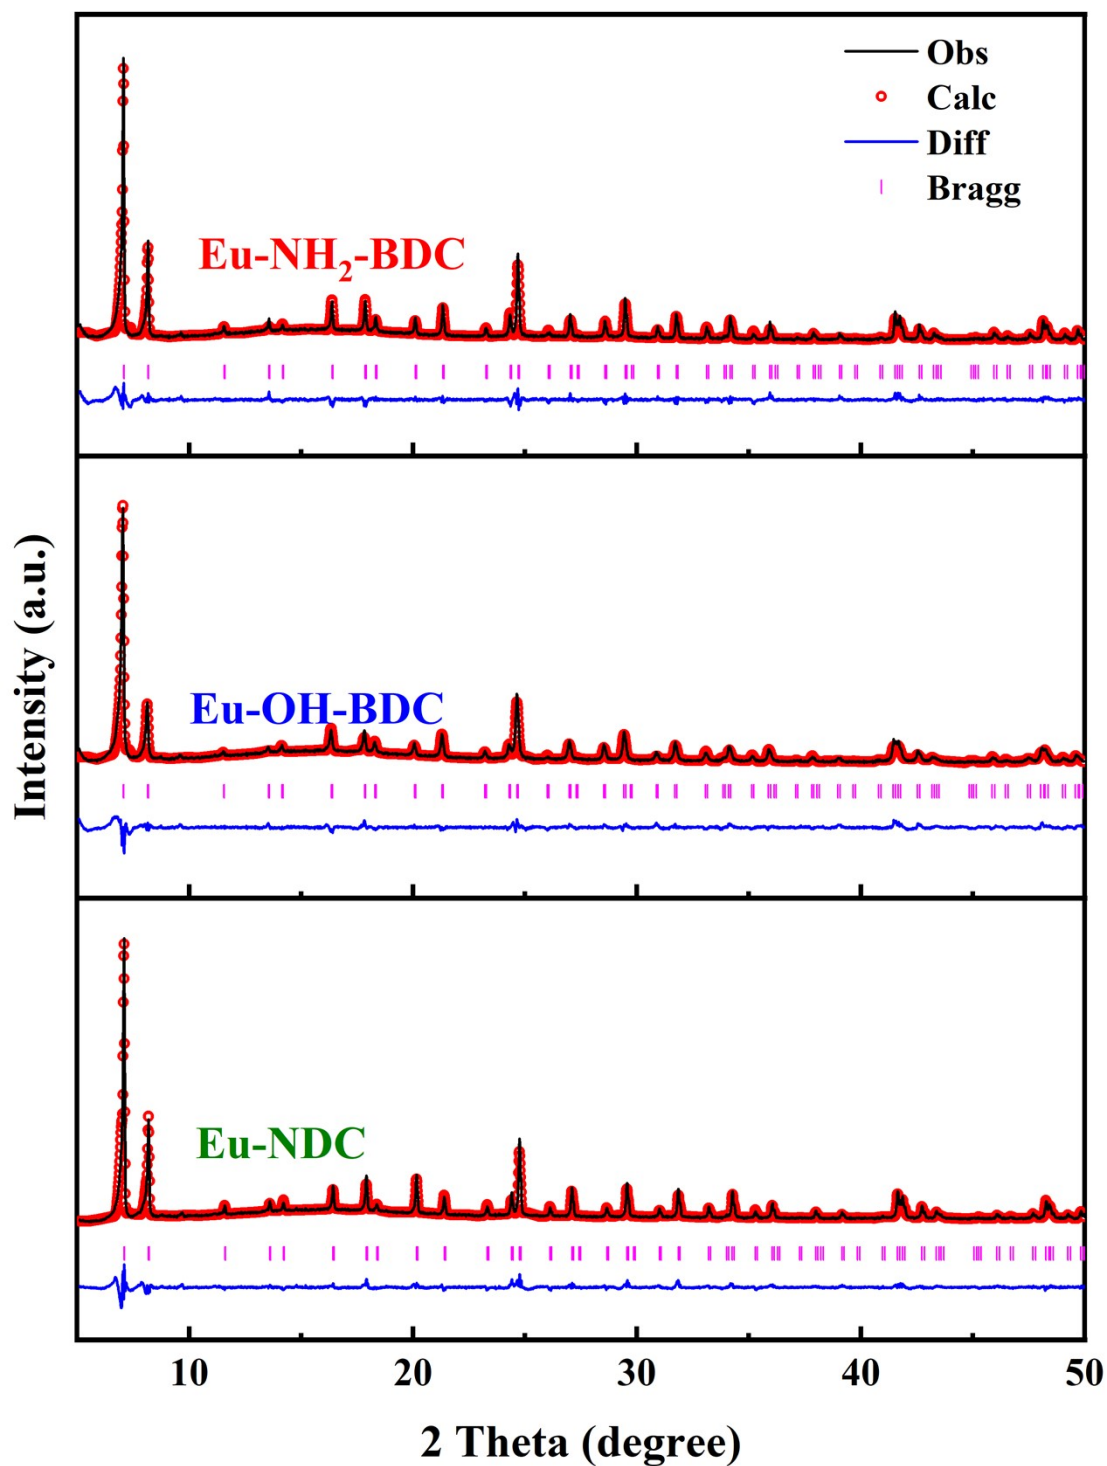

**Figure S12.** Rietveld refinement pattern of (a) Eu-NH<sub>2</sub>-BDC, Eu-OH-BDC, and (c) Eu-NDC at 123 K, experiment data are given as black symbols, the fitted profile as red cycles, and the difference (data-fit) as blue line ( $\chi^2 = 5.94$  for Eu-NH<sub>2</sub>-BDC,  $\chi^2 = 7.54$  for Eu-OH-BDC,  $\chi^2 = 7.32$  for Eu-NDC)

**Table S2** First round of variable-temperature lattice parameters of Eu-NH<sub>2</sub>-BDC extracted from VTXRD using Rietveld refinement.

| Temperature / K | $a / \text{\AA}$ | $V / \text{\AA}^3$ |
|-----------------|------------------|--------------------|
| 123             | 21.61999         | 10105.70           |
| 133             | 21.62405         | 10111.40           |
| 143             | 21.62736         | 10116.04           |
| 153             | 21.62309         | 10110.05           |
| 163             | 21.62704         | 10115.59           |
| 173             | 21.62605         | 10114.20           |
| 183             | 21.62170         | 10108.10           |
| 193             | 21.62457         | 10112.13           |
| 203             | 21.62840         | 10117.50           |
| 213             | 21.62167         | 10108.06           |
| 223             | 21.61824         | 10103.25           |
| 233             | 21.61475         | 10098.36           |
| 243             | 21.60870         | 10089.88           |
| 253             | 21.61218         | 10094.75           |
| 263             | 21.60555         | 10085.47           |
| 273             | 21.60107         | 10079.19           |
| 283             | 21.59831         | 10075.33           |
| 293             | 21.5873          | 10059.93           |
| 303             | 21.58108         | 10051.24           |
| 313             | 21.57676         | 10045.20           |
| 323             | 21.56894         | 10034.28           |
| 333             | 21.55645         | 10016.86           |
| 343             | 21.54486         | 10000.71           |
| 353             | 21.53498         | 9986.96            |
| 363             | 21.52524         | 9973.42            |
| 373             | 21.5165          | 9961.27            |

**Table S3** First round of variable-temperature lattice parameters of Eu-OH-BDC extracted from VTXRD using Rietveld refinement.

| Temperature / K | $a / \text{\AA}$ | $V / \text{\AA}^3$ |
|-----------------|------------------|--------------------|
| 123             | 21.65895         | 10160.43           |
| 133             | 21.6634          | 10166.70           |
| 143             | 21.66651         | 10171.08           |
| 153             | 21.66748         | 10172.44           |
| 163             | 21.66568         | 10169.91           |
| 173             | 21.66307         | 10166.23           |
| 183             | 21.65922         | 10160.81           |
| 193             | 21.6563          | 10156.70           |
| 203             | 21.65028         | 10148.24           |
| 213             | 21.64679         | 10143.33           |
| 223             | 21.63941         | 10132.96           |
| 233             | 21.63176         | 10122.22           |
| 243             | 21.62311         | 10110.08           |
| 253             | 21.64227         | 10136.98           |
| 263             | 21.62178         | 10108.21           |
| 273             | 21.60243         | 10081.10           |
| 283             | 21.5951          | 10070.84           |
| 293             | 21.59023         | 10064.03           |
| 303             | 21.5829          | 10053.78           |
| 313             | 21.57889         | 10048.18           |
| 323             | 21.57467         | 10042.28           |
| 333             | 21.56994         | 10035.68           |
| 343             | 21.56395         | 10027.32           |
| 353             | 21.55531         | 10015.27           |
| 363             | 21.54551         | 10001.62           |
| 373             | 21.53633         | 9988.84            |



**Table S4** First round of variable-temperature lattice parameters of Eu-NDC extracted from VTXRD using Rietveld refinement.

| Temperature / K | $a / \text{\AA}$ | $V / \text{\AA}^3$ |
|-----------------|------------------|--------------------|
| 123             | 21.56304         | 10026.05           |
| 133             | 21.57005         | 10035.83           |
| 143             | 21.57706         | 10045.62           |
| 153             | 21.58078         | 10050.82           |
| 163             | 21.5793          | 10048.75           |
| 173             | 21.58069         | 10050.69           |
| 183             | 21.57983         | 10049.49           |
| 193             | 21.57985         | 10049.52           |
| 203             | 21.57593         | 10044.04           |
| 213             | 21.56977         | 10035.44           |
| 223             | 21.56569         | 10029.75           |
| 233             | 21.56873         | 10033.99           |
| 243             | 21.57017         | 10036.00           |
| 253             | 21.56512         | 10028.95           |
| 263             | 21.55603         | 10016.28           |
| 273             | 21.55209         | 10010.79           |
| 283             | 21.54958         | 10007.29           |
| 293             | 21.54854         | 10005.84           |
| 303             | 21.54777         | 10004.77           |
| 313             | 21.54709         | 10003.82           |
| 323             | 21.54551         | 10001.62           |
| 333             | 21.54349         | 9998.81            |
| 343             | 21.53829         | 9991.57            |
| 353             | 21.52779         | 9976.96            |
| 363             | 21.51976         | 9965.80            |
| 373             | 21.51261         | 9955.87            |

## Second round of variable-temperature PXRD data and Rietveld refinement

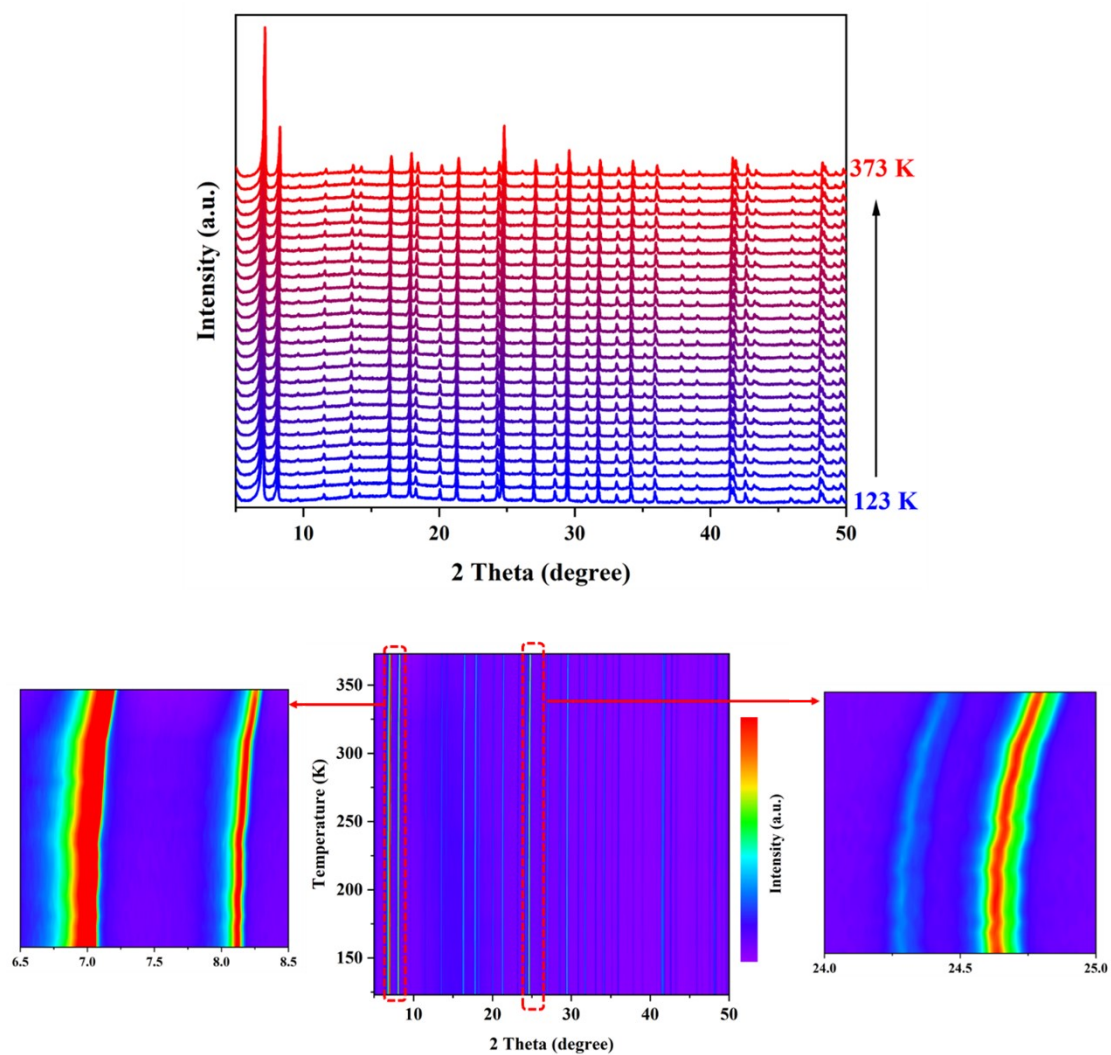

**Figure S13.** Second round of variable-temperature PXRD patterns of Eu-NH<sub>2</sub>-BDC (top) and 2D contours of Eu-NH<sub>2</sub>-BDC (bottom).

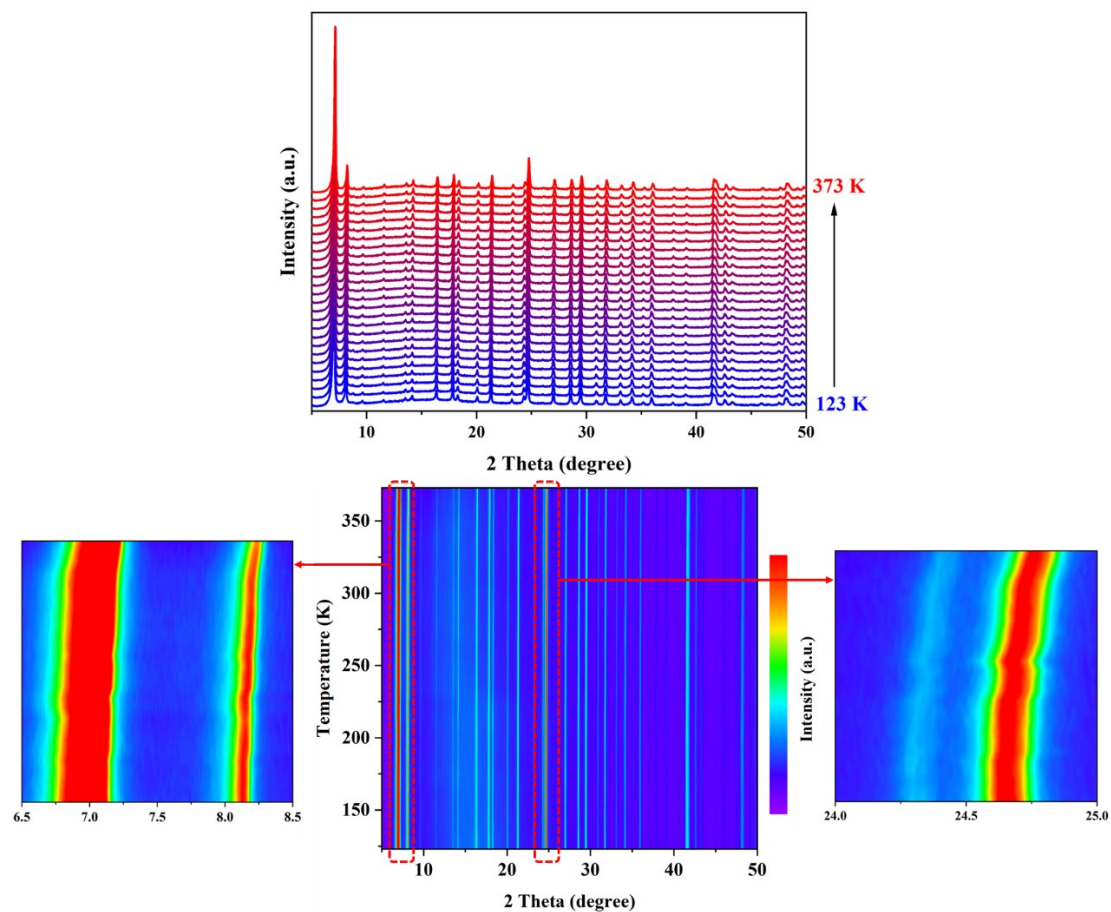

**Figure S14.** Second round of variable-temperature PXRD patterns of Eu-OH-BDC (top) and 2D contours of Eu-OH-BDC (bottom).

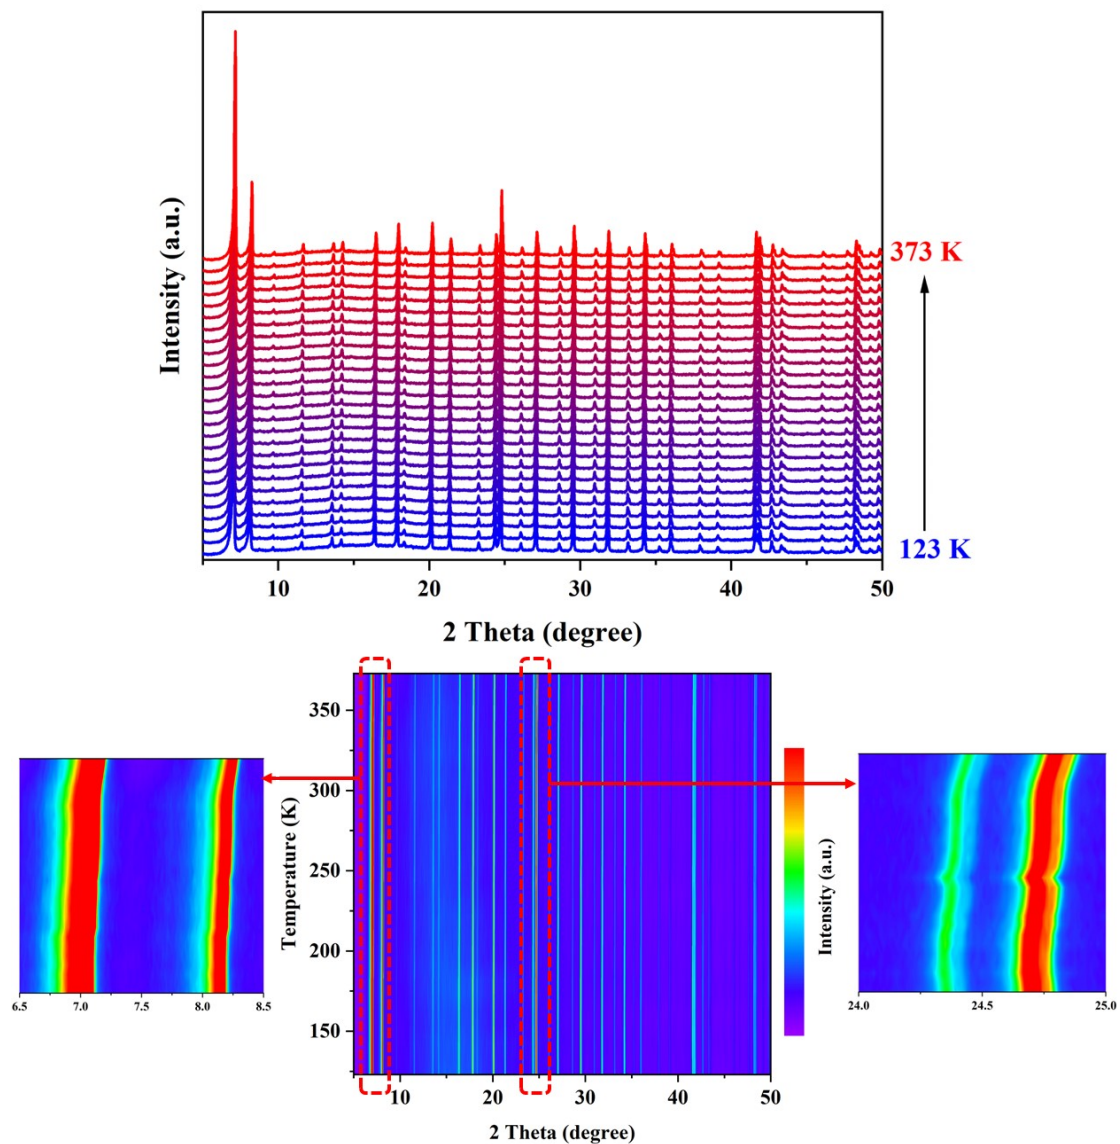

**Figure S15.** Second round of variable-temperature PXRD patterns of Eu-NDC (top) and 2D contours of Eu-NDC (bottom).

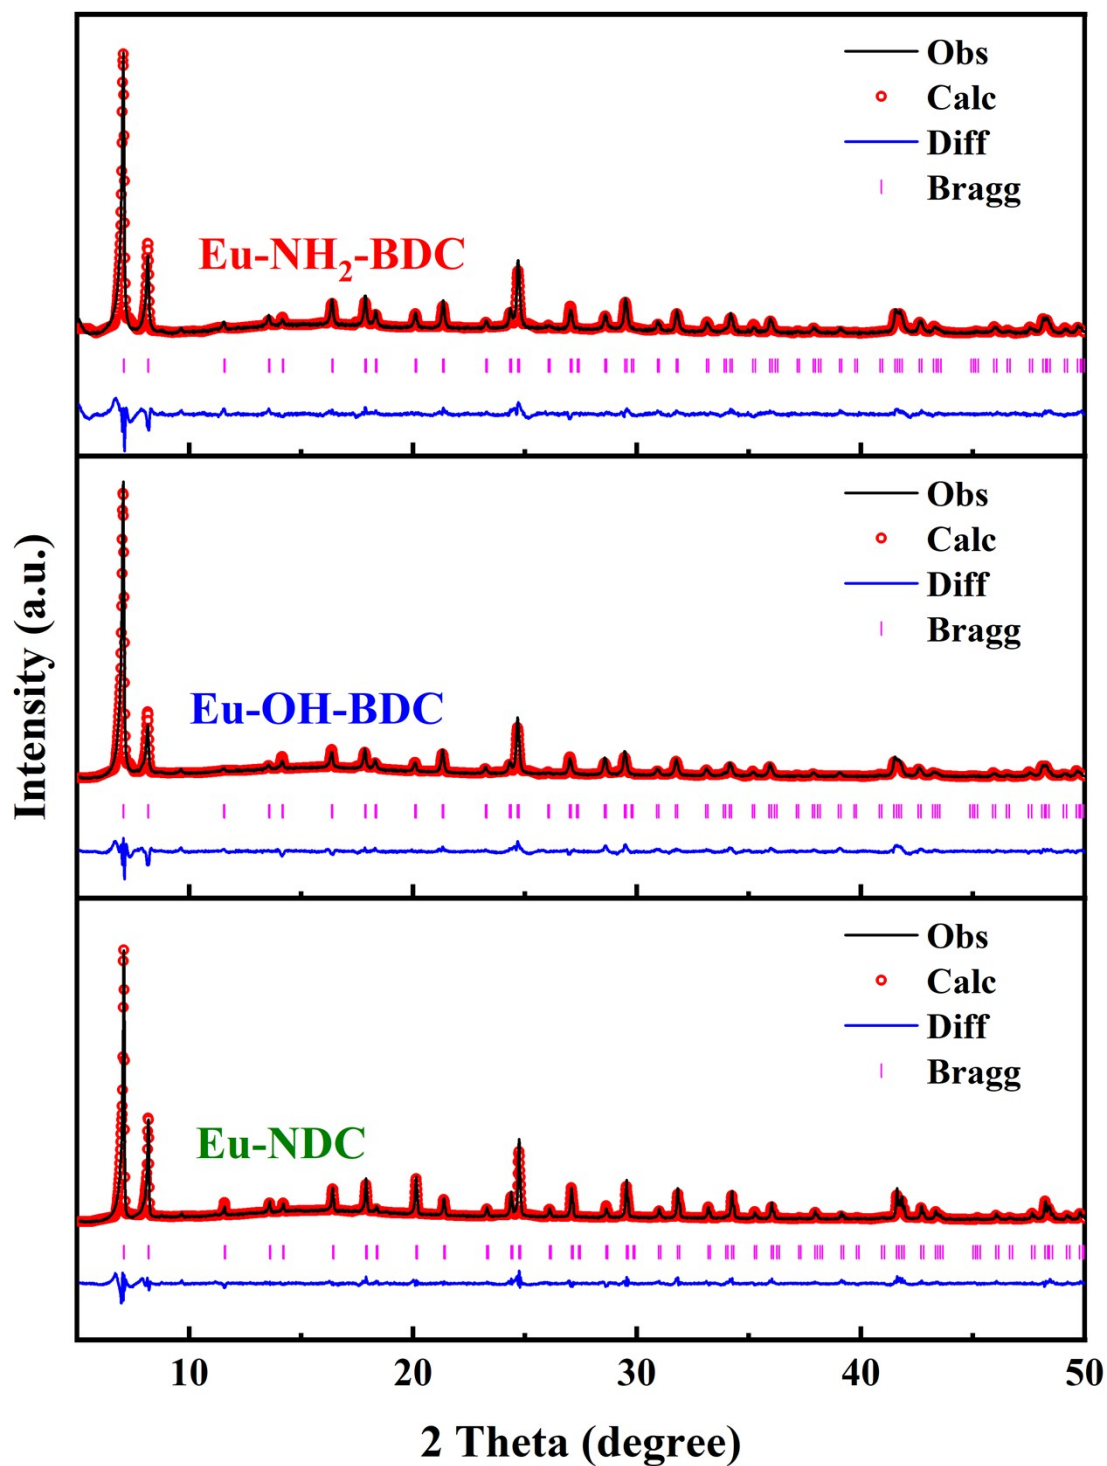

**Figure S16.** Rietveld refinement pattern of (a) Eu-NH<sub>2</sub>-BDC, Eu-OH-BDC, and (c) Eu-NDC at 123 K, experiment data are given as black symbols, the fitted profile as red cycles, and the difference (data-fit) as blue line ( $\chi^2 = 8.22$  for Eu-NH<sub>2</sub>-BDC,  $\chi^2 = 9.06$  for Eu-OH-BDC,  $\chi^2 = 7.09$  for Eu-NDC).

**Table S5** Second round of variable-temperature lattice parameters of Eu-NH<sub>2</sub>-BDC extracted from VTXRD using Rietveld refinement.

| Temperature / K | $a / \text{\AA}$ | $V / \text{\AA}^3$ |
|-----------------|------------------|--------------------|
| 123             | 21.61994         | 10105.63           |
| 133             | 21.62223         | 10108.84           |
| 143             | 21.62207         | 10108.62           |
| 153             | 21.62205         | 10108.59           |
| 163             | 21.62046         | 10106.36           |
| 173             | 21.61961         | 10105.17           |
| 183             | 21.61783         | 10102.67           |
| 193             | 21.61967         | 10105.25           |
| 203             | 21.61843         | 10103.51           |
| 213             | 21.61386         | 10097.11           |
| 223             | 21.6107          | 10092.68           |
| 233             | 21.60859         | 10089.72           |
| 243             | 21.60621         | 10086.39           |
| 253             | 21.6067          | 10087.08           |
| 263             | 21.60234         | 10080.97           |
| 273             | 21.58834         | 10061.38           |
| 283             | 21.58079         | 10050.83           |
| 293             | 21.57429         | 10041.75           |
| 303             | 21.57152         | 10037.89           |
| 313             | 21.5678          | 10032.69           |
| 323             | 21.56447         | 10028.05           |
| 333             | 21.56068         | 10022.76           |
| 343             | 21.55594         | 10016.15           |
| 353             | 21.54996         | 10007.82           |
| 363             | 21.54261         | 9997.58            |
| 373             | 21.5342          | 9985.88            |

**Table S6** Second round of variable-temperature lattice parameters of Eu-OH-BDC extracted from VTXRD using Rietveld refinement.

| Temperature / K | $a / \text{\AA}$ | $V / \text{\AA}^3$ |
|-----------------|------------------|--------------------|
| 123             | 21.63997         | 10133.74           |
| 133             | 21.64212         | 10136.77           |
| 143             | 21.64189         | 10136.44           |
| 153             | 21.64328         | 10138.40           |
| 163             | 21.6428          | 10137.72           |
| 173             | 21.63736         | 10130.08           |
| 183             | 21.63715         | 10129.78           |
| 193             | 21.63838         | 10131.51           |
| 203             | 21.63572         | 10127.78           |
| 213             | 21.63407         | 10125.46           |
| 223             | 21.63136         | 10121.65           |
| 233             | 21.62109         | 10107.24           |
| 243             | 21.61784         | 10102.69           |
| 253             | 21.61484         | 10098.48           |
| 263             | 21.62348         | 10110.60           |
| 273             | 21.61146         | 10093.74           |
| 283             | 21.60303         | 10081.94           |
| 293             | 21.59841         | 10075.47           |
| 303             | 21.59431         | 10069.73           |
| 313             | 21.5919          | 10066.36           |
| 323             | 21.58987         | 10063.52           |
| 333             | 21.58765         | 10060.42           |
| 343             | 21.58192         | 10052.41           |
| 353             | 21.57154         | 10037.91           |
| 363             | 21.56356         | 10026.78           |
| 373             | 21.55598         | 10016.21           |

**Table S7** Second round of variable-temperature lattice parameters of Eu-NDC extracted from VTXRD using Rietveld refinement.

| Temperature / K | $a / \text{\AA}$ | $V / \text{\AA}^3$ |
|-----------------|------------------|--------------------|
| 123             | 21.57983         | 10049.49           |
| 133             | 21.58304         | 10053.98           |
| 143             | 21.58656         | 10058.90           |
| 153             | 21.58754         | 10060.27           |
| 163             | 21.58685         | 10059.30           |
| 173             | 21.58504         | 10056.77           |
| 183             | 21.58392         | 10055.21           |
| 193             | 21.58            | 10049.73           |
| 203             | 21.57837         | 10047.45           |
| 213             | 21.5716          | 10038.00           |
| 223             | 21.56856         | 10033.75           |
| 233             | 21.56702         | 10031.60           |
| 243             | 21.57923         | 10048.65           |
| 253             | 21.57315         | 10040.16           |
| 263             | 21.567           | 10031.58           |
| 273             | 21.56441         | 10027.96           |
| 283             | 21.5622          | 10024.88           |
| 293             | 21.56041         | 10022.38           |
| 303             | 21.56038         | 10022.34           |
| 313             | 21.55983         | 10021.58           |
| 323             | 21.55915         | 10020.63           |
| 333             | 21.55275         | 10011.71           |
| 343             | 21.54779         | 10004.80           |
| 353             | 21.53928         | 9992.95            |
| 363             | 21.52905         | 9978.71            |
| 373             | 21.5198          | 9965.86            |



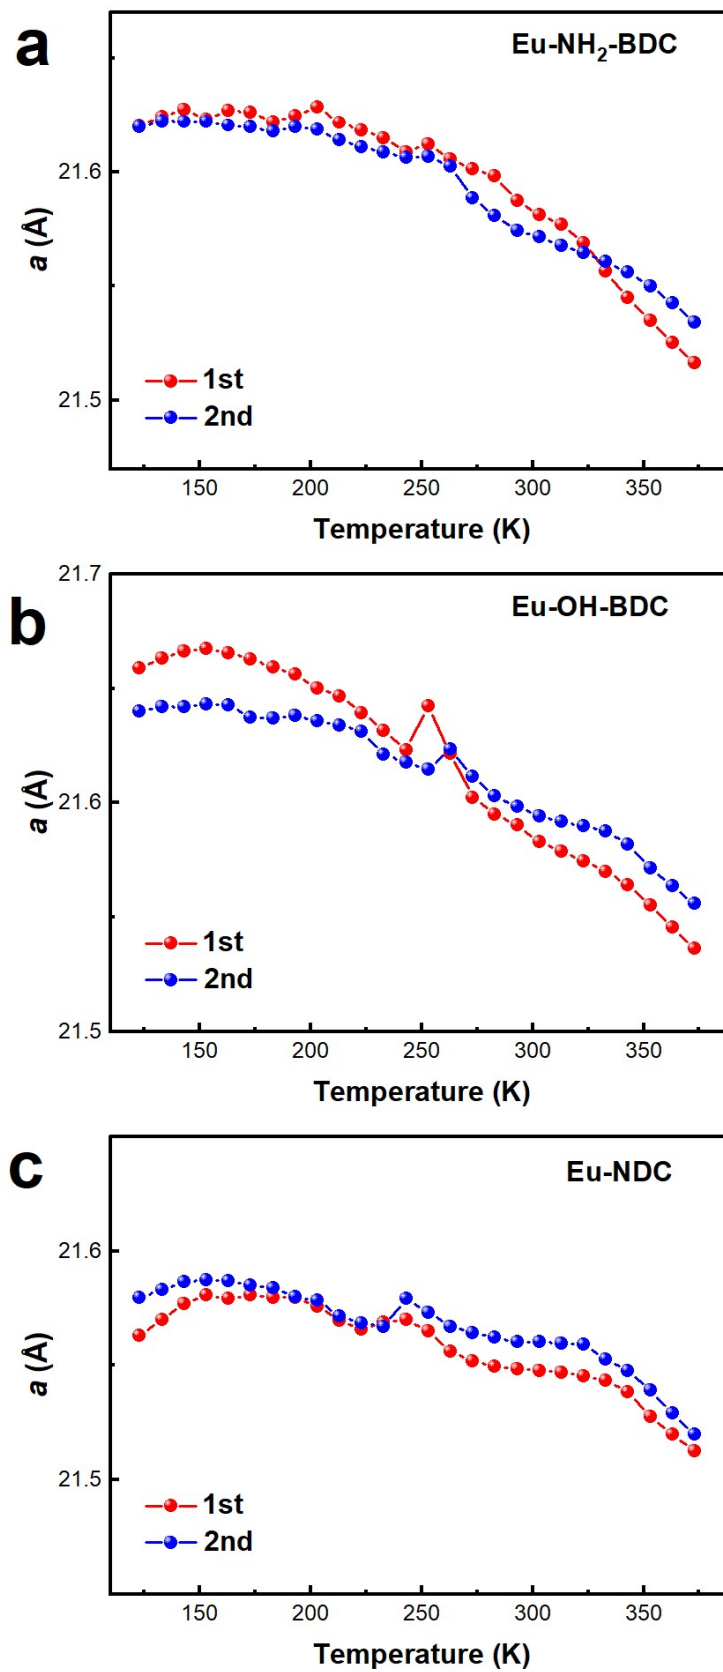

**Figure S17.** Comparison of two rounds of variable temperature PXRD trends for (a) Eu-NH<sub>2</sub>-BDC, (b) Eu-OH-BDC, and (c) Eu-NDC.

### **Variable Temperature Single Crystal X-ray Diffraction (SCXRD) Analyses**

Variable temperature single crystal X-ray diffraction measurements for activated Eu-MOFs were conducted at the X-ray crystallography platform of the Beijing Institute of Technology. The data were collected using a Rigaku XtaLAB Synergy Custom diffractometer with a Mo K $\alpha$  radiation ( $\lambda = 0.71073 \text{ \AA}$ ) at 100, 150, 200, 250, and 300 K. The selected crystals were covered with paratone oil, and mounted onto the goniometer under the cold N<sub>2</sub> gas stream. Temperature control using the instrument software. The structures were solved by intrinsic phasing (SHELXT)<sup>2</sup> and refined by full-matrix least squares on F<sup>2</sup> (SHELXL-2019)<sup>3</sup> on Olex2 software (ver. 1.5)<sup>4</sup>. All non-hydrogen atoms were refined anisotropically. The thermal constraint (ISOR, RIGU) was used for the structural refinement of the ligands.

Crystallographic data are summarized in Supplementary Table 8-10. Crystallographic information files (CIF) have been deposited in the Cambridge Crystallographic Data Centre (CCDC) under deposition number CCDC 2246487-2246501. The data can be obtained free of charge via [www.ccdc.cam.ac.uk/data\\_request/cif](http://www.ccdc.cam.ac.uk/data_request/cif) (or from the Cambridge Crystallographic Data Centre, 12 Union Road, Cambridge CB2 1EZ, U.K.).

**Table S8** Temperature-dependent crystallographic data of compound Eu-NH<sub>2</sub>-BDC.

| Eu-NH <sub>2</sub> -BDC                                                  | 100 K                                                    | 150 K                                                    | 200 K                                                    | 250 K                                                    | 300 K                                                    |
|--------------------------------------------------------------------------|----------------------------------------------------------|----------------------------------------------------------|----------------------------------------------------------|----------------------------------------------------------|----------------------------------------------------------|
| Empirical formula                                                        | C <sub>96</sub> Eu <sub>12</sub> N <sub>12</sub> O<br>64 |
| Crystal system                                                           | cubic                                                    | cubic                                                    | cubic                                                    | cubic                                                    | cubic                                                    |
| Space group                                                              | <i>Fm</i> -3 <i>m</i>                                    |
| <i>a</i> /Å                                                              | 21.6551(8)                                               | 21.7212(8)                                               | 21.7226(9)                                               | 21.6449(8)                                               | 21.5913(7)                                               |
| <i>b</i> /Å                                                              | 21.6551(8)                                               | 21.7212(8)                                               | 21.7226(9)                                               | 21.6449(8)                                               | 21.5913(7)                                               |
| <i>c</i> /Å                                                              | 21.6551(8)                                               | 21.7212(8)                                               | 21.7226(9)                                               | 21.6449(8)                                               | 21.5913(7)                                               |
| $\alpha$ /°                                                              | 90                                                       | 90                                                       | 90                                                       | 90                                                       | 90                                                       |
| $\beta$ /°                                                               | 90                                                       | 90                                                       | 90                                                       | 90                                                       | 90                                                       |
| $\gamma$ /°                                                              | 90                                                       | 90                                                       | 90                                                       | 90                                                       | 90                                                       |
| <i>V</i> /Å <sup>3</sup>                                                 | 10155.0(11)                                              | 10248.3(11)                                              | 10250.3(13)                                              | 10140.7(11)                                              | 10065.5(10)                                              |
| $\rho_{calc}$ mg/mm <sup>3</sup>                                         | 1.363                                                    | 1.351                                                    | 1.351                                                    | 1.365                                                    | 1.375                                                    |
| <i>Z</i>                                                                 | 2                                                        | 2                                                        | 2                                                        | 2                                                        | 2                                                        |
| $\mu$ (Mo K $\alpha$ )/mm <sup>-1</sup>                                  | 3.707                                                    | 3.673                                                    | 3.672                                                    | 3.712                                                    | 3.740                                                    |
| <i>F</i> (000)                                                           | 3856.0                                                   | 3856.0                                                   | 3856.0                                                   | 3856.0                                                   | 3856.0                                                   |
| <i>R</i> <sub>1</sub> <sup>a</sup> [ <i>I</i> > 2 $\sigma$ ( <i>I</i> )] | 0.0425(525)                                              | 0.0490(492)                                              | 0.0513(435)                                              | 0.0437(515)                                              | 0.0482(459)                                              |
| <i>wR</i> <sub>2</sub> <sup>b</sup>                                      | 0.1182(687)                                              | 0.1350(642)                                              | 0.1442(609)                                              | 0.1218(679)                                              | 0.1389(604)                                              |
| GOF <sup>c</sup>                                                         | 1.026                                                    | 1.048                                                    | 1.020                                                    | 1.037                                                    | 1.063                                                    |
| Data completeness                                                        | 99.4                                                     | 99.0                                                     | 94.1                                                     | 99.2                                                     | 96.3                                                     |
| CCDC                                                                     | 2246487                                                  | 2246488                                                  | 2246489                                                  | 2246490                                                  | 2246491                                                  |

<sup>a</sup>  $R = \sum ||F_o| - |F_c|| / \sum |F_o|$ . <sup>b</sup>  $wR = \{\sum w(F_o^2 - F_c^2)^2 / \sum w(F_o^2)^2\}^{1/2}$ . <sup>c</sup>  $GOF = \{\sum w((F_o^2 - F_c^2)^2) / (n - p)\}^{1/2}$ , where

*n* = number of reflections and *p* = total number of parameters refined.

**Table S9** Temperature-dependent crystallographic data of compound Eu-OH-BDC.

| Eu-OH-BDC                                                                | 100 K                                            | 150 K                                            | 200 K                                            | 250 K                                            | 300 K                                            |
|--------------------------------------------------------------------------|--------------------------------------------------|--------------------------------------------------|--------------------------------------------------|--------------------------------------------------|--------------------------------------------------|
| Empirical formula                                                        | C <sub>96</sub> Eu <sub>12</sub> O <sub>76</sub> |
| Crystal system                                                           | cubic                                            | cubic                                            | cubic                                            | cubic                                            | cubic                                            |
| Space group                                                              | <i>Fm</i> -3 <i>m</i>                            |
| <i>a</i> /Å                                                              | 21.6800(12)                                      | 21.7434(16)                                      | 21.6439(12)                                      | 21.6136(13)                                      | 21.556(2)                                        |
| <i>b</i> /Å                                                              | 21.6800(12)                                      | 21.7434(16)                                      | 21.6439(12)                                      | 21.6136(13)                                      | 21.556(2)                                        |
| <i>c</i> /Å                                                              | 21.6800(12)                                      | 21.7434(16)                                      | 21.6439(12)                                      | 21.6136(13)                                      | 21.556(2)                                        |
| $\alpha$ /°                                                              | 90                                               | 90                                               | 90                                               | 90                                               | 90                                               |
| $\beta$ /°                                                               | 90                                               | 90                                               | 90                                               | 90                                               | 90                                               |
| $\gamma$ /°                                                              | 90                                               | 90                                               | 90                                               | 90                                               | 90                                               |
| <i>V</i> /Å <sup>3</sup>                                                 | 10190.1(16)                                      | 10280(2)                                         | 10139.3(17)                                      | 10096.8(18)                                      | 10017(3)                                         |
| $\rho_{calc}$ mg/mm <sup>3</sup>                                         | 1.366                                            | 1.354                                            | 1.373                                            | 1.379                                            | 1.390                                            |
| <i>Z</i>                                                                 | 2                                                | 2                                                | 2                                                | 2                                                | 2                                                |
| $\mu$ (Mo K $\alpha$ )/mm <sup>-1</sup>                                  | 3.697                                            | 3.665                                            | 3.716                                            | 3.731                                            | 3.761                                            |
| <i>F</i> (000)                                                           | 3880.0                                           | 3880.0                                           | 3880.0                                           | 3880.0                                           | 3880.0                                           |
| <i>R</i> <sub>1</sub> <sup>a</sup> [ <i>I</i> > 2 $\sigma$ ( <i>I</i> )] | 0.0922(519)                                      | 0.0913(458)                                      | 0.0875(481)                                      | 0.0786(425)                                      | 0.0670(454)                                      |
| <i>wR</i> <sub>2</sub> <sup>b</sup>                                      | 0.2331(720)                                      | 0.2249(637)                                      | 0.2384(699)                                      | 0.2022(615)                                      | 0.1753(687)                                      |
| GOF <sup>c</sup>                                                         | 1.037                                            | 1.105                                            | 1.080                                            | 1.071                                            | 1.013                                            |
| Data completeness                                                        | 99                                               | 98.3                                             | 97.5                                             | 96.5                                             | 98.4                                             |
| CCDC                                                                     | 2246492                                          | 2246493                                          | 2246494                                          | 2246495                                          | 2246496                                          |

<sup>a</sup>  $R = \sum ||F_o| - |F_c|| / \sum |F_o|$ . <sup>b</sup>  $wR = \{ \sum w(F_o^2 - F_c^2)^2 / \sum w(F_o^2)^2 \}^{1/2}$ . <sup>c</sup>  $GOF = \{ \sum w((F_o^2 - F_c^2)^2) / (n - p) \}^{1/2}$ , where *n* = number of reflections and *p* = total number of parameters refined.

**Table S10** Temperature-dependent crystallographic data of compound Eu-NDC.

| Eu-NDC                                                                   | 100 K                 | 150 K                 | 200 K                 | 250 K                 | 300 K                 |
|--------------------------------------------------------------------------|-----------------------|-----------------------|-----------------------|-----------------------|-----------------------|
| Empirical formula                                                        | C132Eu12O64           | C132Eu12O64           | C132Eu12O64           | C132Eu12O64           | C132Eu12O64           |
| Crystal system                                                           | cubic                 | cubic                 | cubic                 | cubic                 | cubic                 |
| Space group                                                              | <i>Fm</i> -3 <i>m</i> |
| <i>a</i> /Å                                                              | 21.6408(6)            | 21.6573(6)            | 21.6554(6)            | 21.6478(5)            | 21.5900(6)            |
| <i>b</i> /Å                                                              | 21.6408(6)            | 21.6573(6)            | 21.6554(6)            | 21.6478(5)            | 21.5900(6)            |
| <i>c</i> /Å                                                              | 21.6408(6)            | 21.6573(6)            | 21.6554(6)            | 21.6478(5)            | 21.5900(6)            |
| $\alpha$ /°                                                              | 90                    | 90                    | 90                    | 90                    | 90                    |
| $\beta$ /°                                                               | 90                    | 90                    | 90                    | 90                    | 90                    |
| $\gamma$ /°                                                              | 90                    | 90                    | 90                    | 90                    | 90                    |
| <i>V</i> /Å <sup>3</sup>                                                 | 10134.9(8)            | 10158.1(8)            | 10155.4(8)            | 10144.8(7)            | 10063.7(8)            |
| $\rho_{calc}$ mg/mm <sup>3</sup>                                         | 1.453                 | 1.449                 | 1.450                 | 1.451                 | 1.463                 |
| <i>Z</i>                                                                 | 2                     | 2                     | 2                     | 2                     | 2                     |
| $\mu$ (Mo K $\alpha$ )/mm <sup>-1</sup>                                  | 3.718                 | 3.709                 | 3.710                 | 3.714                 | 3.744                 |
| <i>F</i> (000)                                                           | 4120.0                | 4120.0                | 4120.0                | 4120.0                | 4120.0                |
| <i>R</i> <sub>1</sub> <sup>a</sup> [ <i>I</i> > 2 $\sigma$ ( <i>I</i> )] | 0.0464(537)           | 0.0438(541)           | 0.0426(539)           | 0.0437(546)           | 0.0476(519)           |
| <i>wR</i> <sub>2</sub> <sup>b</sup>                                      | 0.1220(630)           | 0.1189(631)           | 0.1114(633)           | 0.1205(635)           | 0.1286(630)           |
| GOF <sup>c</sup>                                                         | 1.084                 | 1.176                 | 1.106                 | 1.133                 | 1.074                 |
| Data completeness                                                        | 99.2                  | 99.2                  | 99.4                  | 99.4                  | 99.6                  |
| CCDC                                                                     | 2246497               | 2246498               | 2246499               | 2246500               | 2246501               |

<sup>a</sup>  $R = \sum ||F_o| - |F_c|| / \sum |F_o|$ . <sup>b</sup>  $wR = \{ \sum w(F_o^2 - F_c^2)^2 / \sum w(F_o^2)^2 \}^{1/2}$ . <sup>c</sup>  $GOF = \{ \sum w((F_o^2 - F_c^2)^2) / (n - p) \}^{1/2}$ , where *n* = number of reflections and *p* = total number of parameters refined.

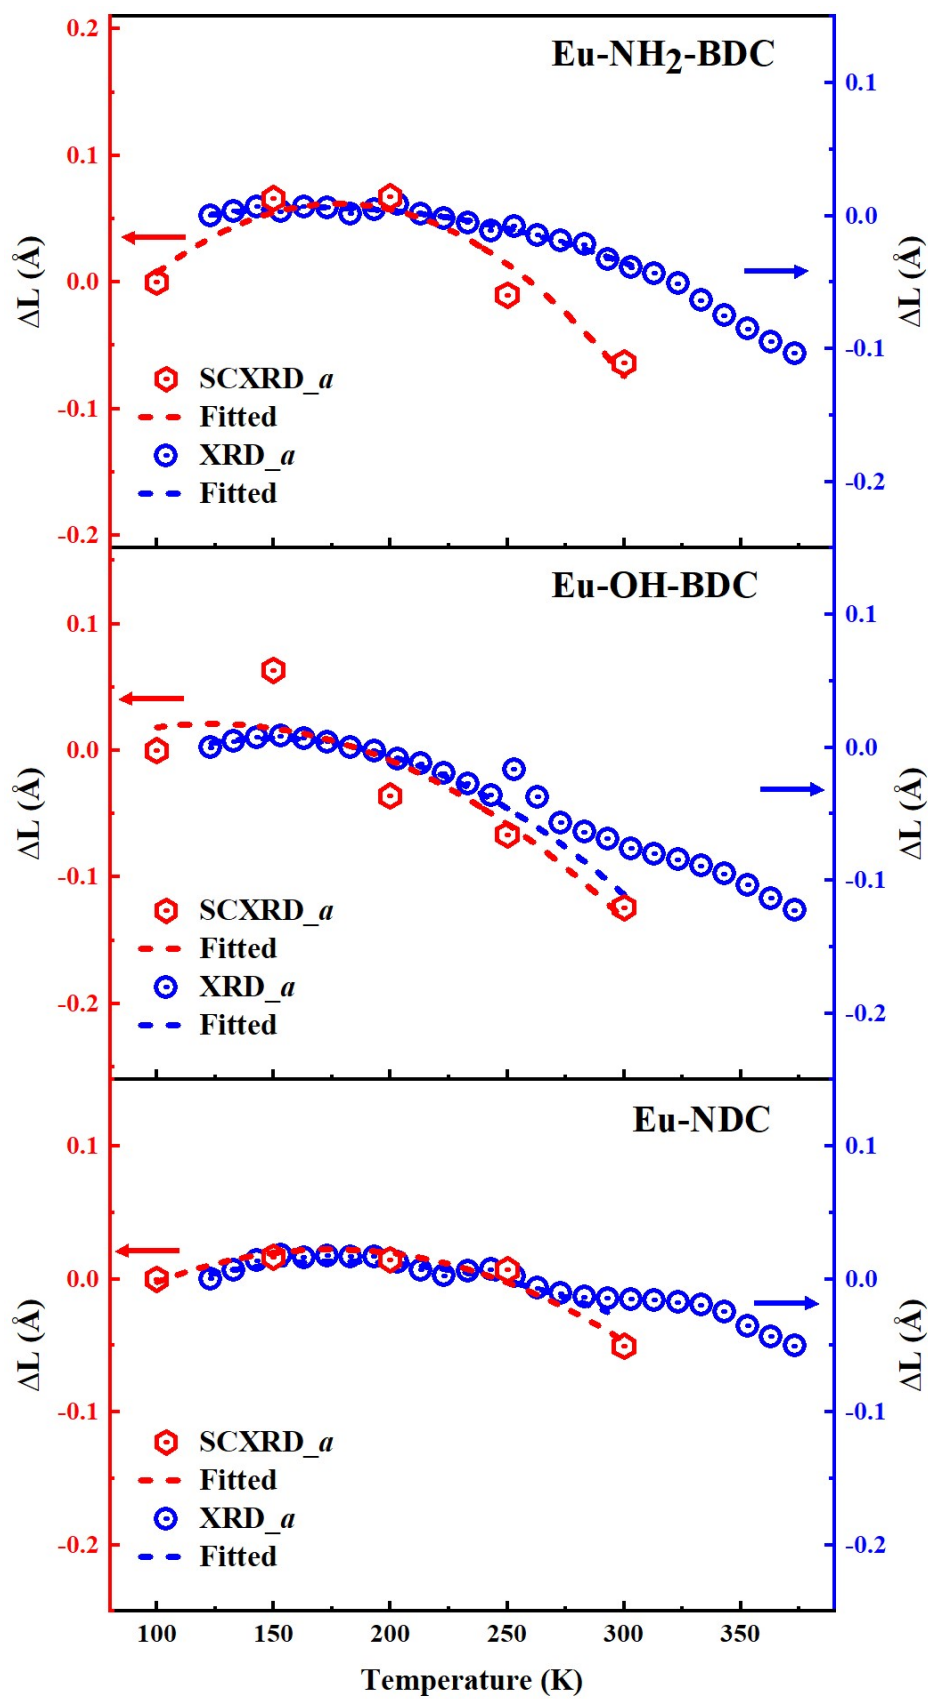

**Figure S18.** Comparison of SCXRD and XRD trends for (a) Eu-NH<sub>2</sub>-BDC, (b) Eu-OH-BDC, and (c) Eu-NDC.

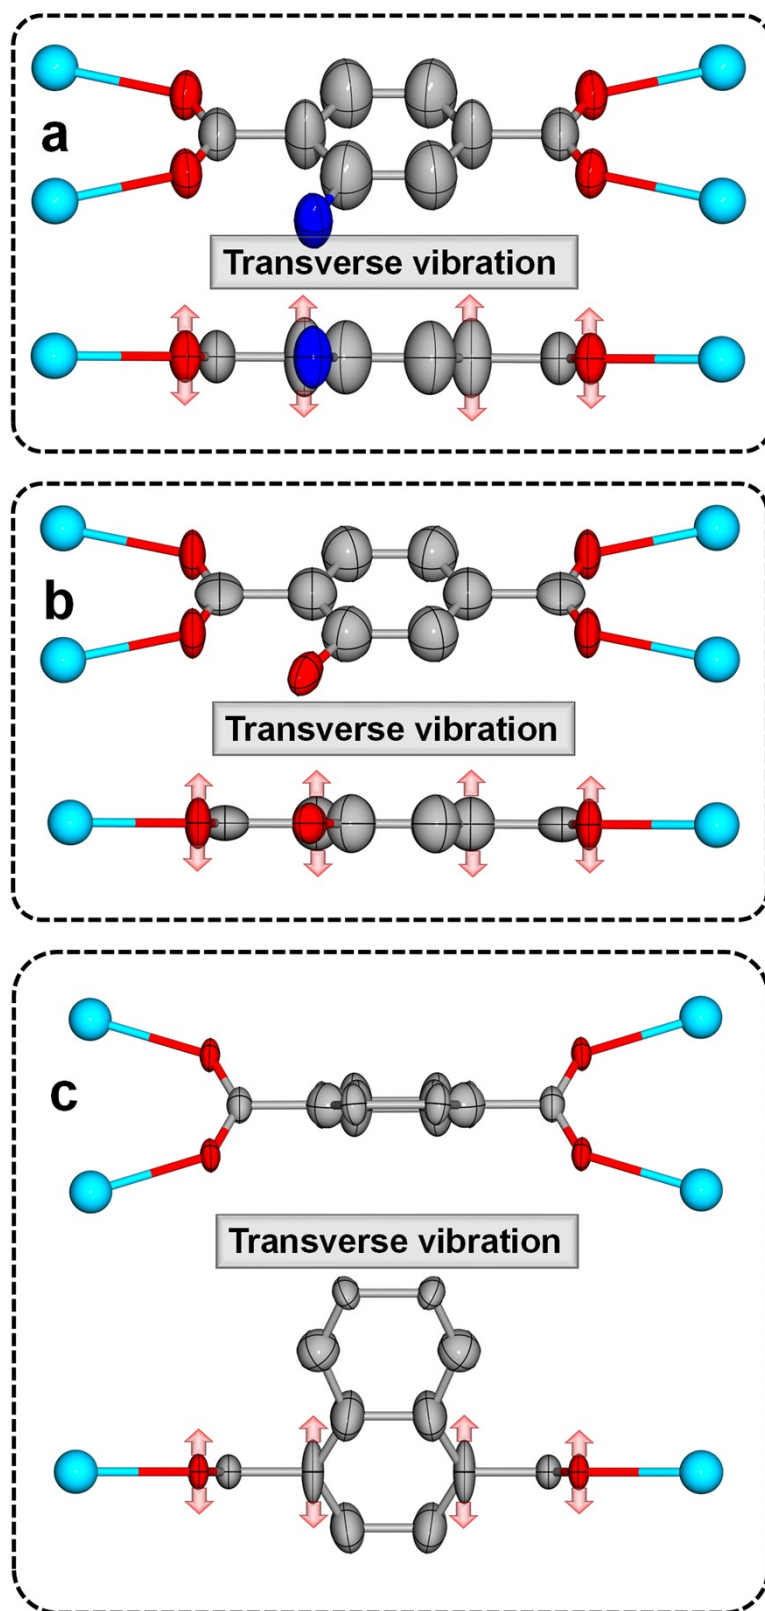

**Figure S19.** Atomic thermal vibrations in the crystal structures of (a) Eu-NH<sub>2</sub>-BDC, (b) Eu-OH-BDC, and (c) Eu-NDC at 100 K. The size of ellipsoids is indicating the magnitude of ADPs.

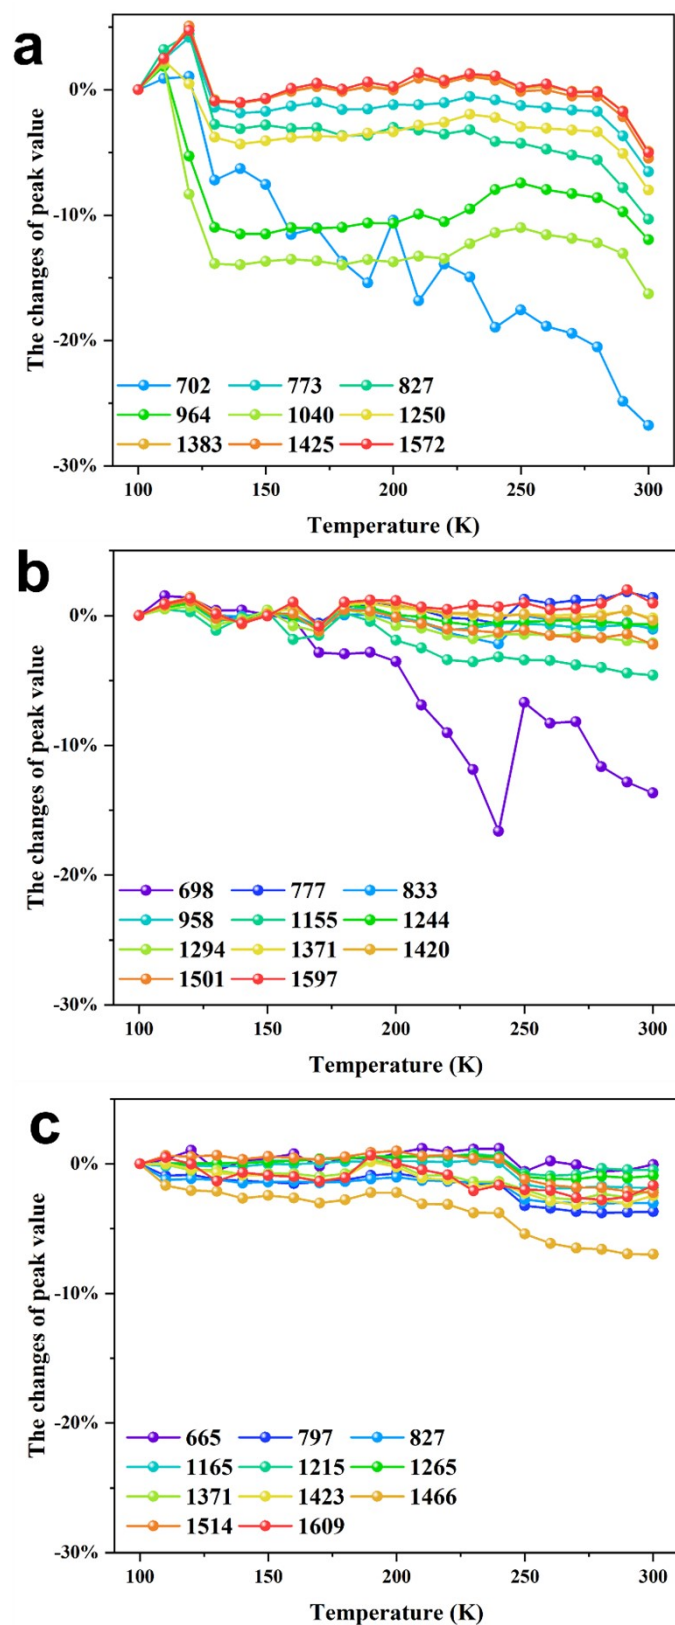

**Figure S20.** Change of Infrared peaks with temperature in (a) Eu-NH<sub>2</sub>-BDC, (b) Eu-OH-BDC, and (c) Eu-NDC.



## References

1. Macrae, C. F. *et al.* Mercury CSD 2.0 - new features for the visualization and investigation of crystal structures. *J. Appl. Crystallogr.* **41**, 466-470 (2008).
2. Sheldrick, G. M. A short history of SHELX. *Acta Cryst.* **A64**, 112-122 (2008).
3. Sheldrick, G. M. Crystal structure refinement with SHELXL. *Acta Cryst.* **C71**, 3-8 (2015).
4. Dolomanov, O. V. *et al.* OLEX2: a complete structure solution, refinement and analysis program. *J. Appl. Crystallogr.* **42**, 339-341 (2009).
